# Supplementary material for: Chromosome and Molecular Analyses Reveal Significant Intraspecific Karyotype Diversity and Provide New Evidence on the Origin of Tetraploid Grass <em>Aegilops columnaris</em>
Source: Preprints.org preprint supplement (doi:10.20944/preprints202104.0375.v1), 2021-04-14
Supplement: Supplementary file 1 [file supplementary]

**Supplementary materials:**

**Supplementary Table 1**

Primers for amplification and sequencing of plastome fragments

| Plastome fragment | Primers 5’-3’ | Annealing temperature |
| --- | --- | --- |
| (*trnH(ugu)-psbA* | F: CGC GCA TGG TGG ATT CAC AAT CC  R: GTT ATG CAT GAA CGT AAT GCT C | 58 0C |
| *rpl32-trnL(tag)* | F: CAGTTCCAAAAAAACGTACTTC  R: CTGCTTCCTAAGAGCAGCGT | 56 0C |
| *trnT(ugu)-trnL(uaa)* | F: TCT ACC GAT TTC GCC ATA TC  R: CAA ATG CGA TGC TCT AAC CT | 55 0C |


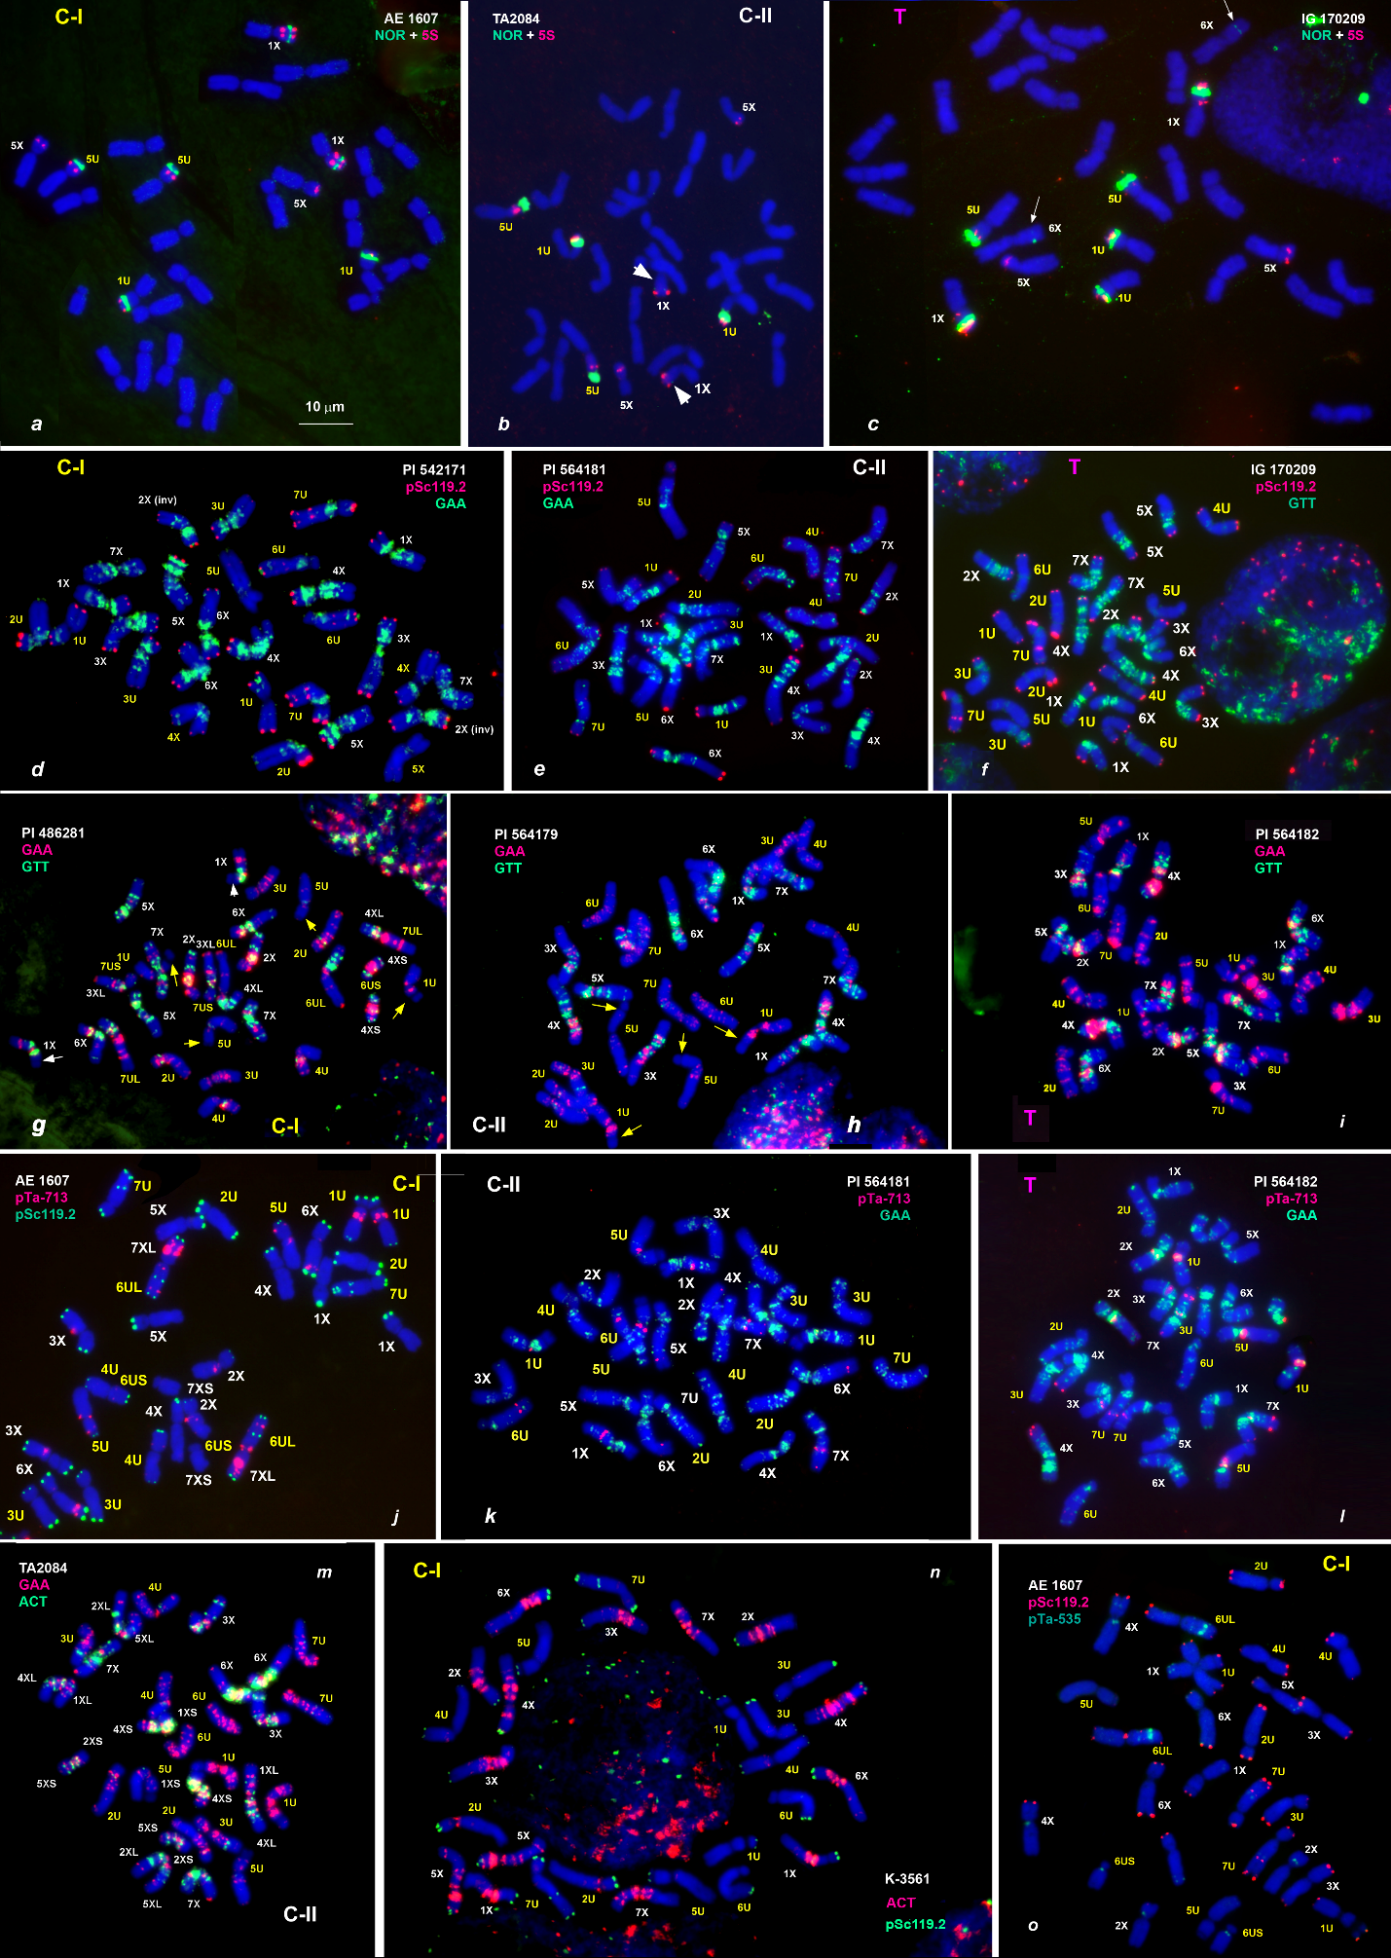


**Supplementary Figure S1. Hybridization of different DNA probes on chromosomes of C-I (***a, d, g, j, n, o*)**and C-II (***b, e, h, k, m*)**groupsof *Ae. columnaris* in comparison with *Ae. neglecta –* T (***c, f, i, l, m***)*.*** Chromosomal group, accession numbers, and probe combinations are given on corresponding cell images; probe color corresponds to signal color. Chromosomes are numbered according to genetic nomenclature; the Uc chromosomes are designated with yellow, while the Xc – white letters. Scale bar – 10 µm.


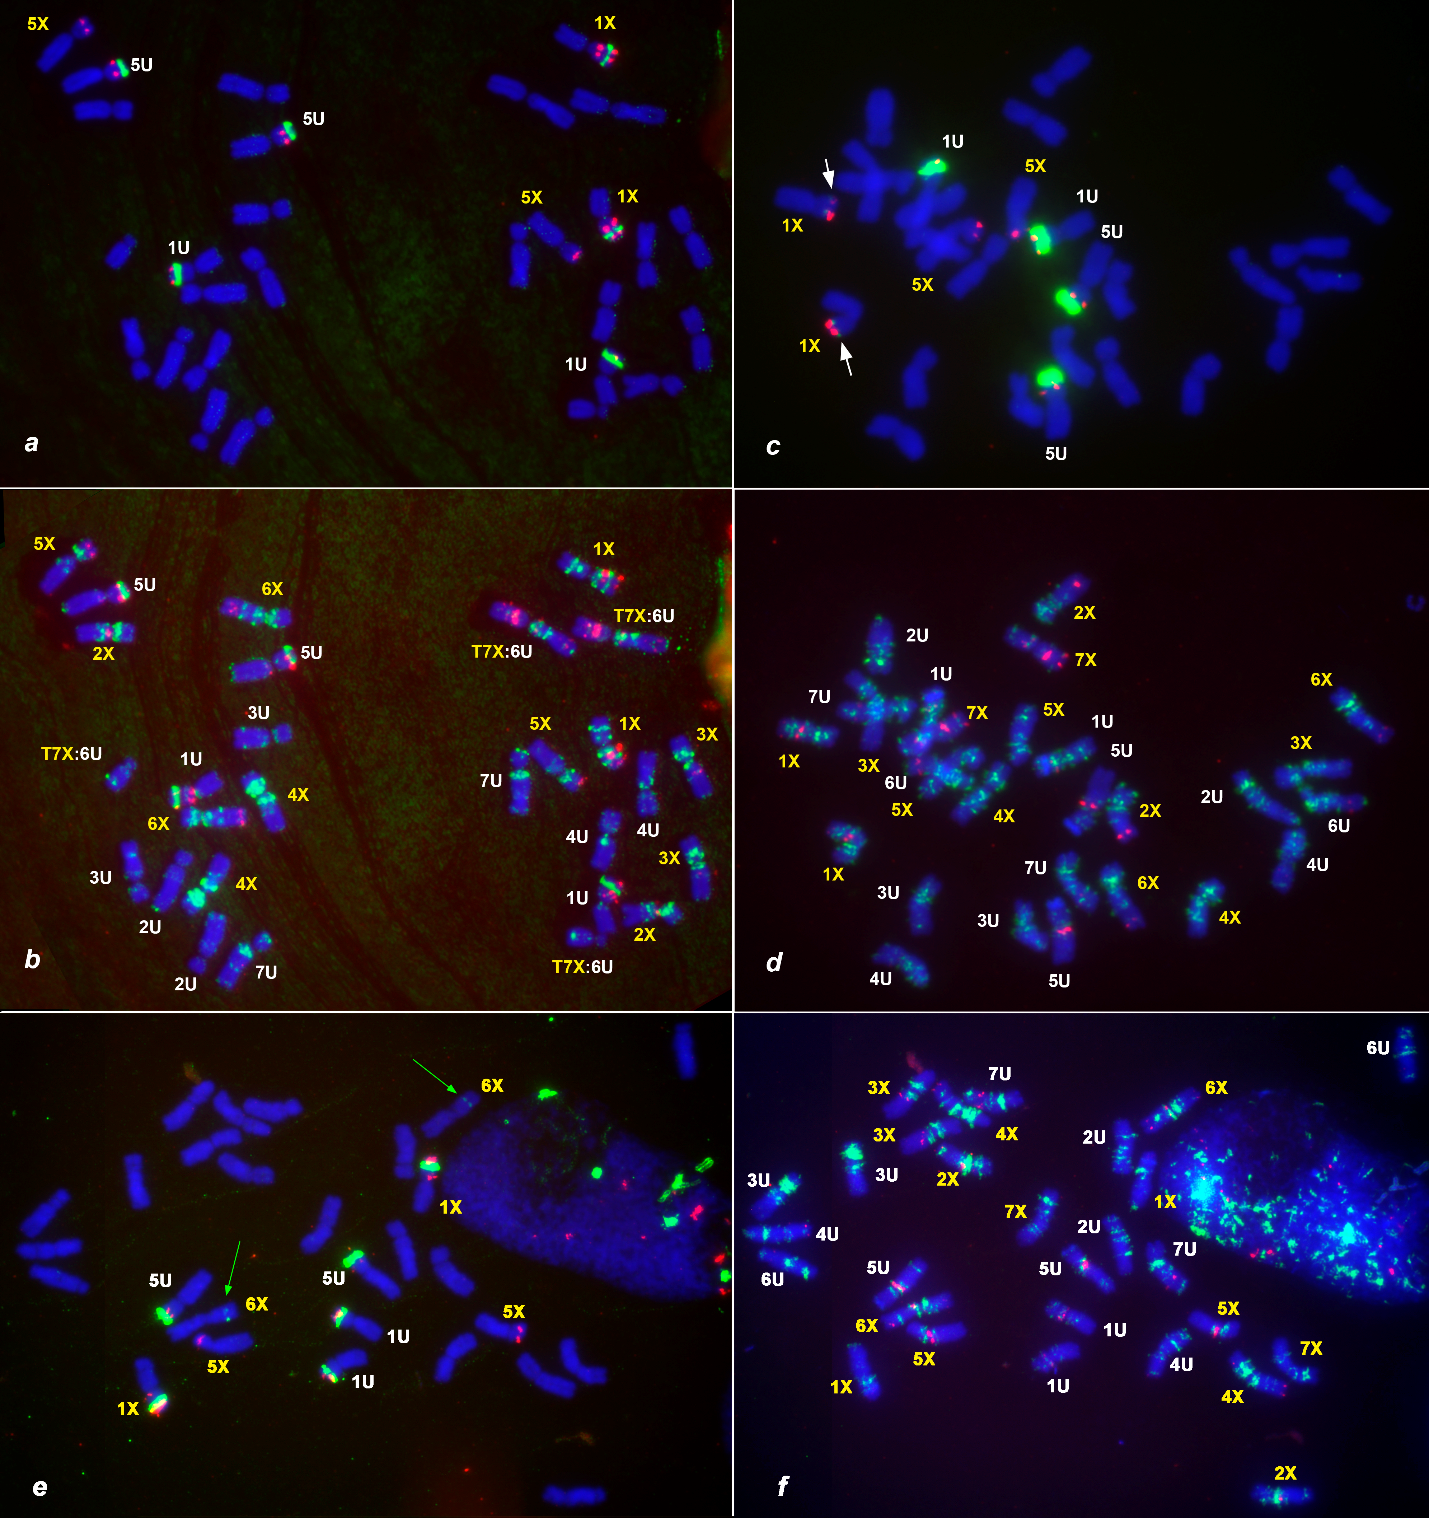


**Supplementary Figure S2. Sequential FISH with 5S (red) and 45S (green) rDNA probes (*a, c, e*) followed by hybridization with GAAn (green) and pTa-713 (red) (*b, d, f*) on chromosomes of *Ae. columnaris* accessions AE 1607 (C-I, *a, b*), PI 542191 (C-II, *c, d*), and *Ae. neglecta,* PI 564182.** Chromosomes are designated according to genetic nomenclature, the Uc chromosomes with white and Xc with yellow letters. Translocated 76Uc:Xcchromosomes are indicated (*b*); white arrows point to the position of minor NORs on the chromosome 1Xc (*c*). Green arrows point to minor NORs on chromosome 6Xtr (*f*). Owing to a limited space of metaphase images, the superscripts “c” and ‘tr’ are omitted from the Figure.


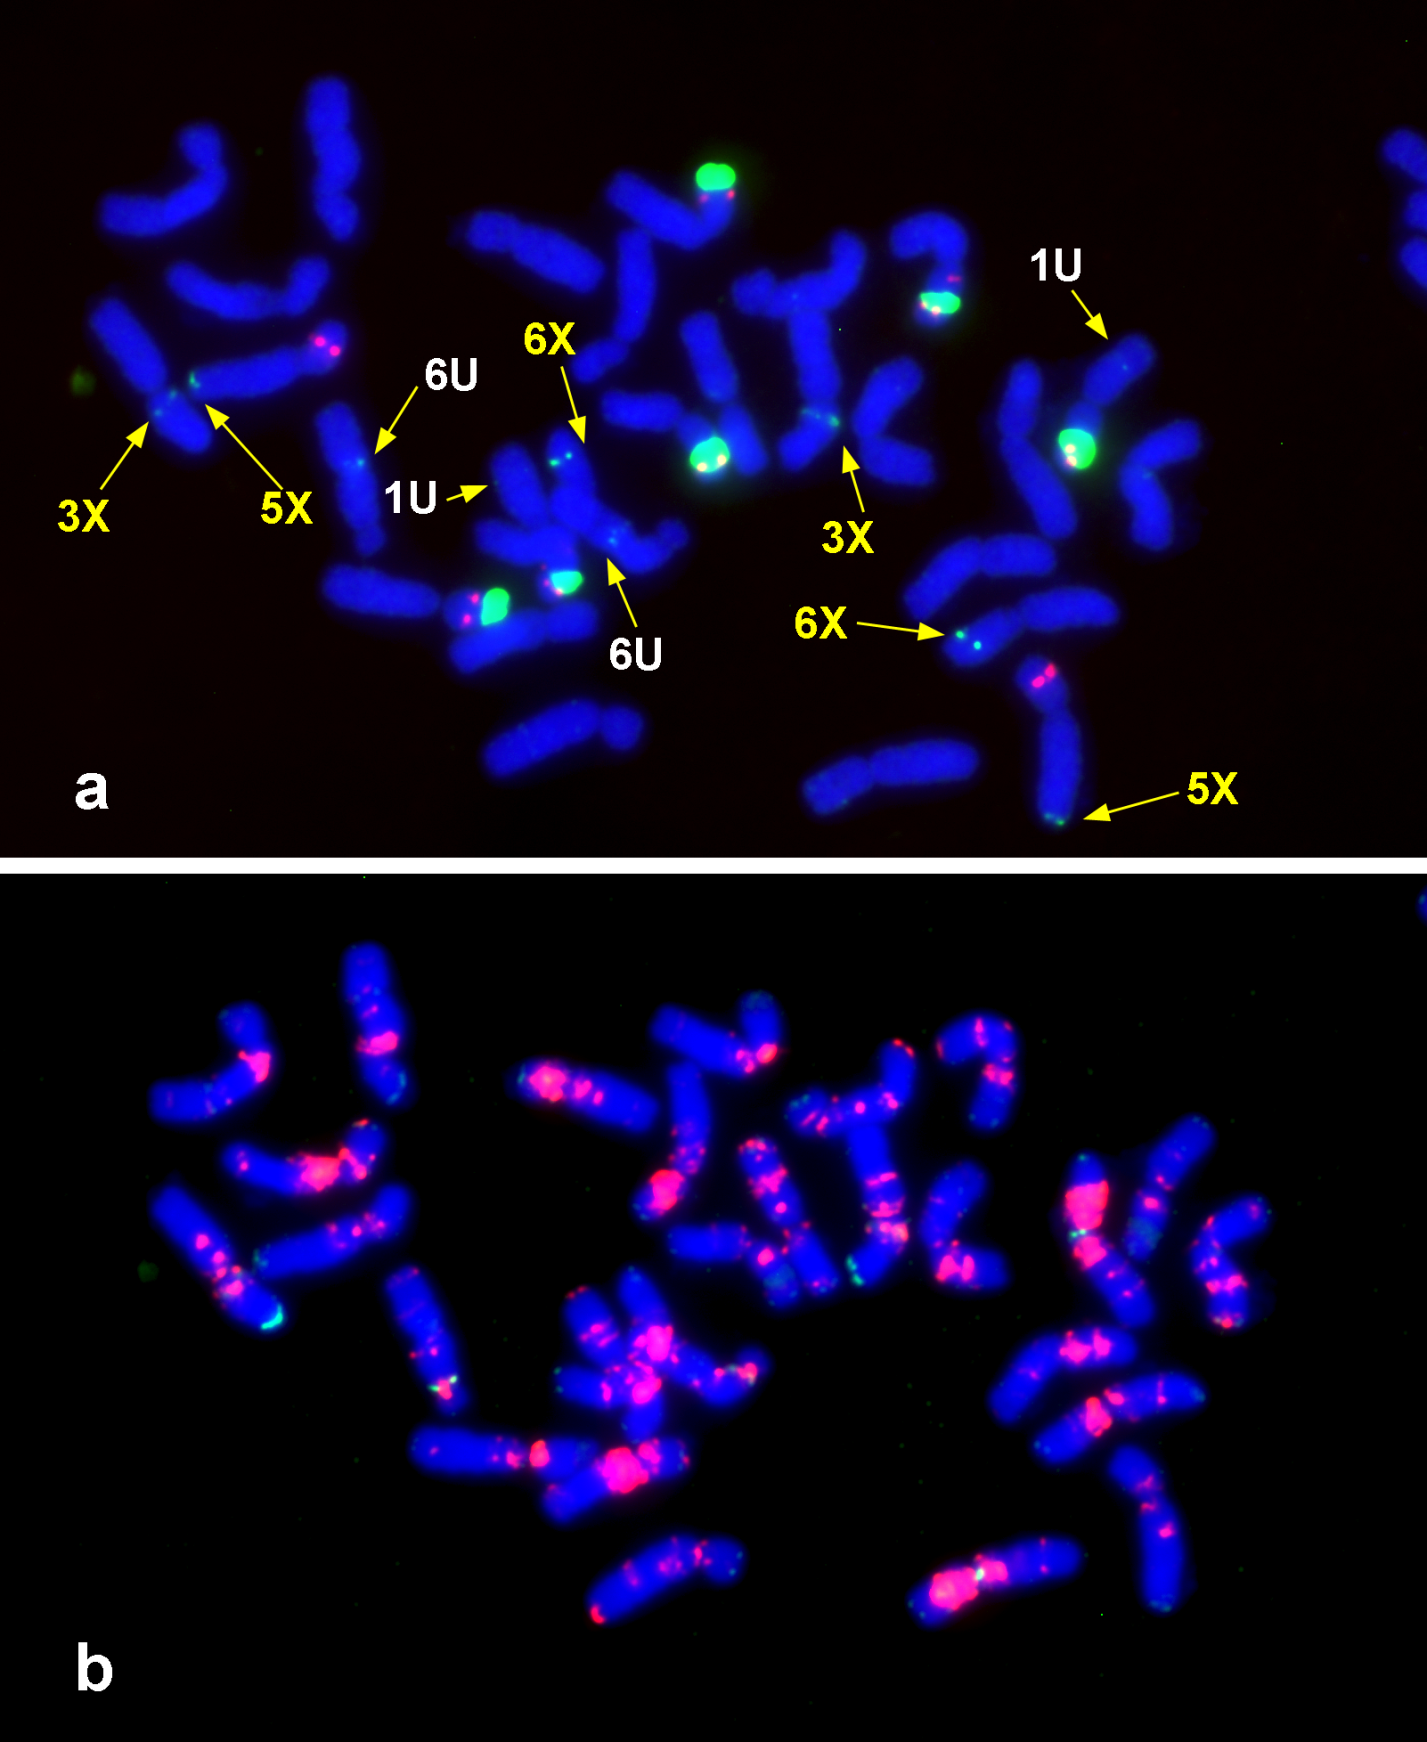


**Supplementary Figure S3. Location of minor NORs on chromosomes of *Ae. neglecta,* PI 564182 by sequential FISH with oligo-probes pTa71-1 (green) and pTa794 (red) – a, followed by GAAn (red) and pAs1 (green) - b**. Minor NORs are indicated with arrows (a), and the respective chromosomes are identified according to their GAAn-FISH patterns (b).


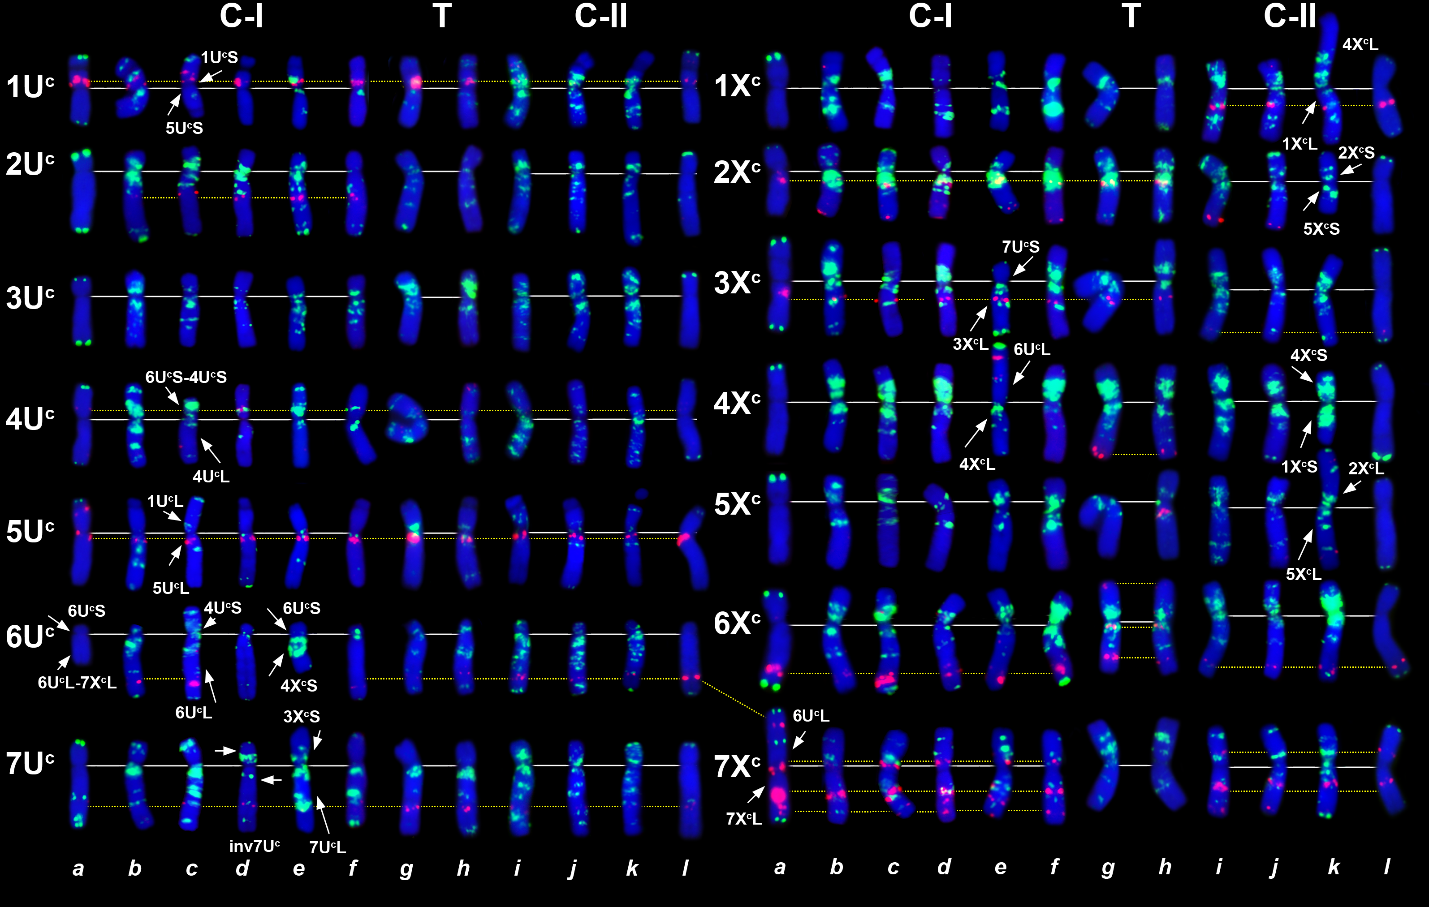


**Supplementary Figure S4. Diversity of the pTa-713 probe (red) patterns on chromosomes of *Ae. columnaris,* C-I (*a-f*) in comparison with *Ae. neglecta,* T (*g, h*) and *Ae. columnaris,* C-II (*i-l*)**: *a –* AE 1607; *b –* K-4241; *c –* K-1193; *d -* i-570045); *e –* PI 486281; *f –* PI 554178; *g –* PI 564182; *h –* IG 170209; *i –* PI 542191; *j –* PI 564181; *k –* TA2084; *l –* PI 564180. Chromosomes are classified based on pSc119.2 (*a, l*) or GAAn-labelling patterns (green signals). Chromosomes are classified according to genetic nomenclature; translocated chromosomes are designated. Invariable pTa-713 sites are shown with yellow dotted lines.

**
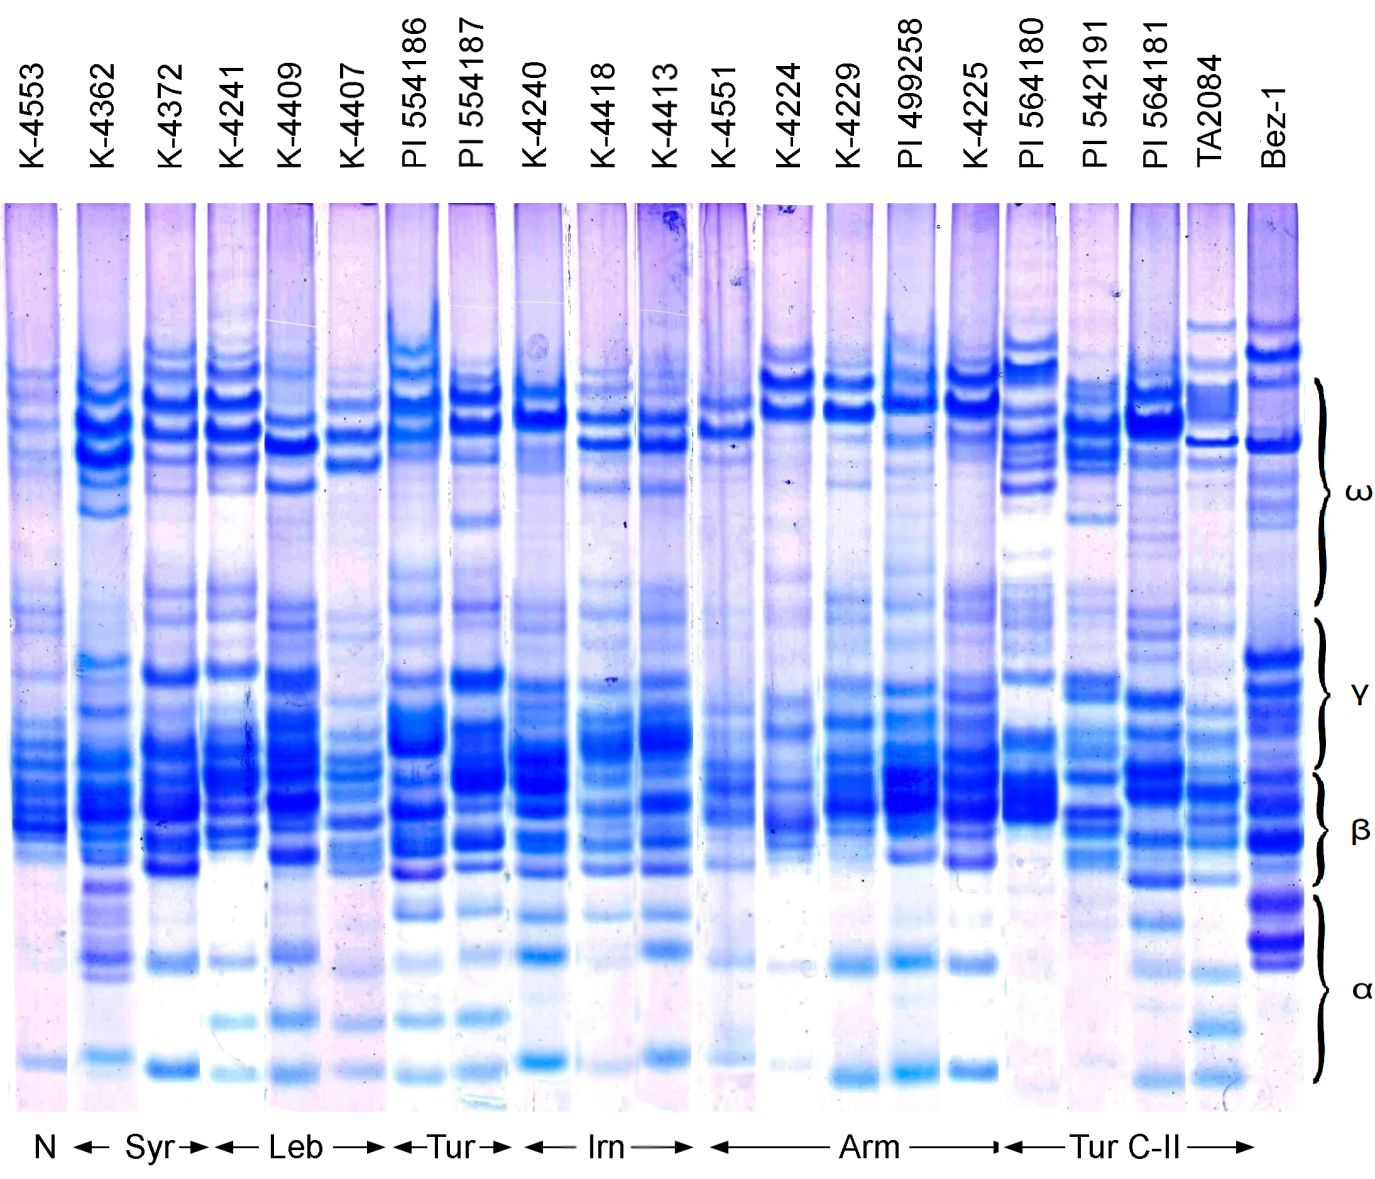
Supplementary Figure S5. Diversity of gliadin spectra of *Ae. columnaris* accessions collected from different countries in comparison with *Ae. neglecta* (N).** Accession numbers are shown on the top, while their geographic origin – on the bottom of the figure. α, β, γ, and ω - zones in electrophoretic spectra.


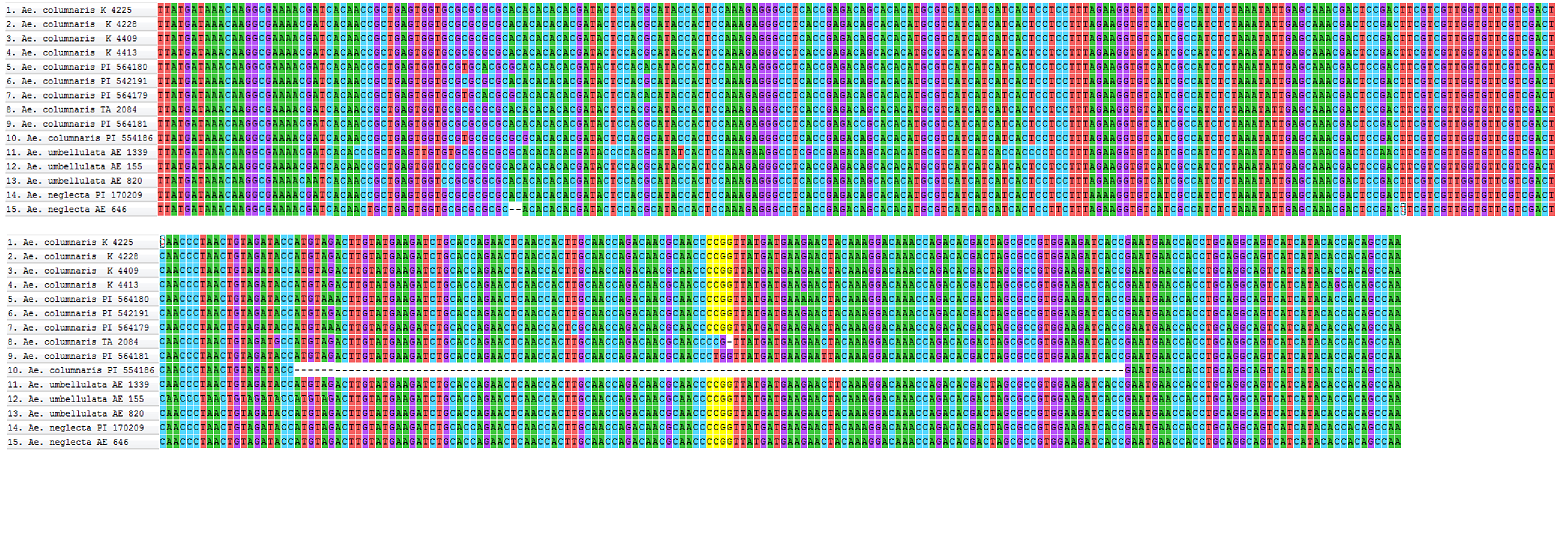


**Supplementary Figure S6**. **Nucleotide variability in the U31 region of analyzed *Aegilops* accessions.** The *Msp*I restriction site is highlighted in yellow.


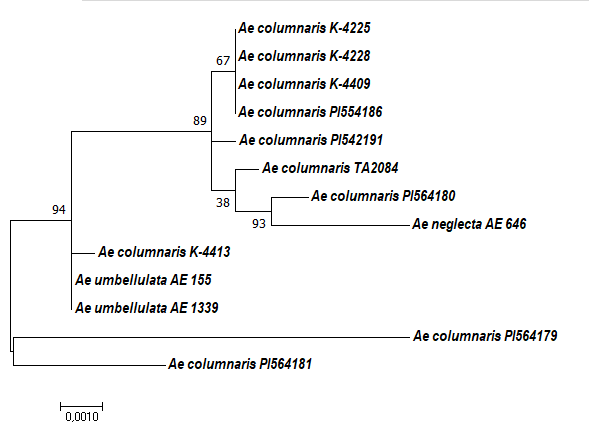


**Supplementary Figure S7. Maximum-Likelihood (Tamura-3 parameter model) phylogenetic tree of the combined *trnH-psbA, trnT-trnL, rpL32-trnL* sequences**; the numbers above the branches indicate bootstrap values: branch length measured in a number of substitutions per site.
